# Supplementary material for: Development of Genus-Specific PCR Primers for Molecular Monitoring of Invasive Nostocalean Cyanobacteria
Source: MDPI journal article supplement (doi:10.3390/ijerph18115703), 2021-05-26
Supplement: s1 [file s1]

# Supplementary Figures for Development of Genus-Specific PCR Primers for Molecular Monitoring of Invasive Nostocalean Cyanobacteria

In-Soo Kim<sup>a</sup>, Hae-Kyung Park<sup>a\*</sup>, Yong-Jin Kim<sup>a</sup>

<sup>a</sup> Nakdong River Environment Research Center, National Institute of Environmental Research, Daegu, Republic of Korea

\* Corresponding author : Hae-Kyung Park, [parkhknier@korea.kr](mailto:parkhknier@korea.kr)

Supplementary Figures contain:

5 pages

4 figures

a)

*Sphaerospermopsis aphanizomenoides*  
*Sphaerospermopsis reniformis*  
*Aphanizomenon flos-aquae*  
*Aphanizomenon gracile*  
*Dolichospermum planctonicum*  
*Dolichospermum circinale*  
*Dolichospermum flos-aquae*  
*Cuspidothrix issatschenkoi*

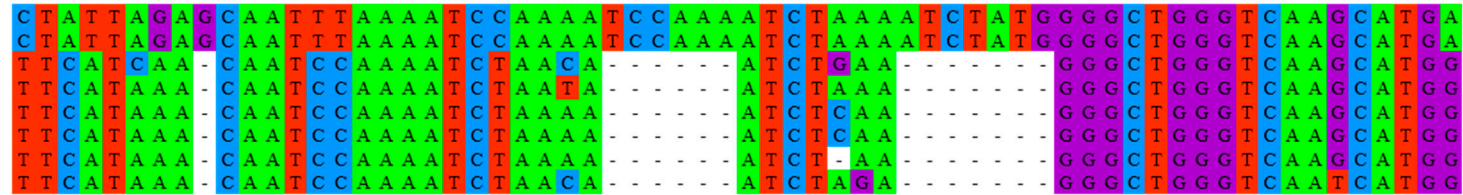

b)

*Sphaerospermopsis aphanizomenoides*  
*Sphaerospermopsis reniformis*  
*Aphanizomenon flos-aquae*  
*Aphanizomenon gracile*  
*Dolichospermum planctonicum*  
*Dolichospermum circinale*  
*Dolichospermum flos-aquae*  
*Cuspidothrix issatschenkoi*

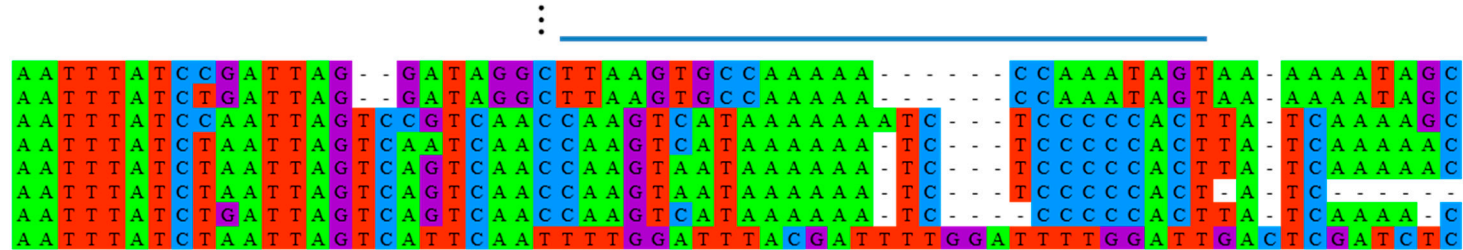

Figure S1. The results of multiple-sequence comparative analysis of *rbcLX* gene sequences from the nostocalean cyanobacteria; a) forward, b) reverse sequence.

a)

*Cuspidothrix issatschenkoi*  
*Aphanizomenon flos-aquae*  
*Aphanizomenon gracile*  
*Dolichospermum planctonicum*  
*Dolichospermum circinale*  
*Dolichospermum flos-aquae*

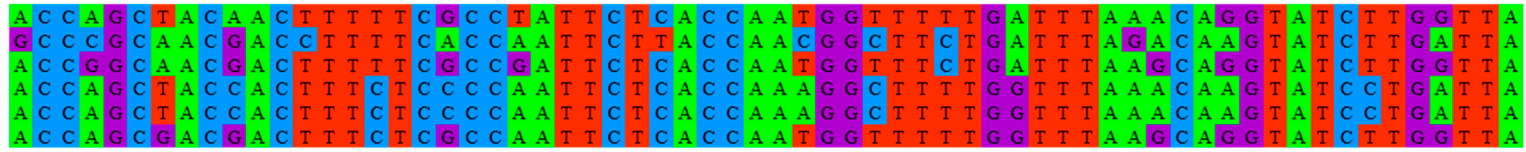

⋮

b)

*Cuspidothrix issatschenkoi*  
*Aphanizomenon flos-aquae*  
*Aphanizomenon gracile*  
*Dolichospermum planctonicum*  
*Dolichospermum circinale*  
*Dolichospermum flos-aquae*

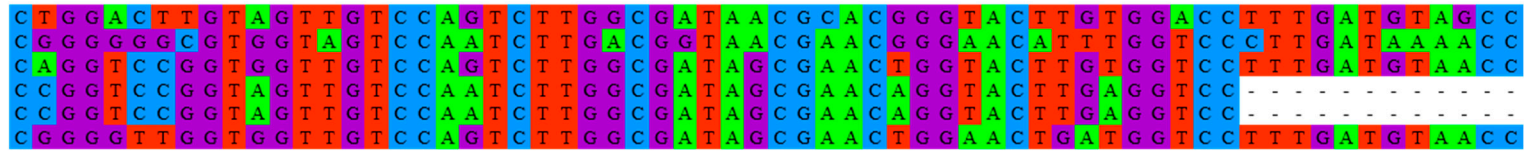

Figure S2. The results of multiple-sequence comparative analysis of *rpoB* gene sequences from the nostocalean cyanobacteria; a) forward, b) reverse sequence.

a)

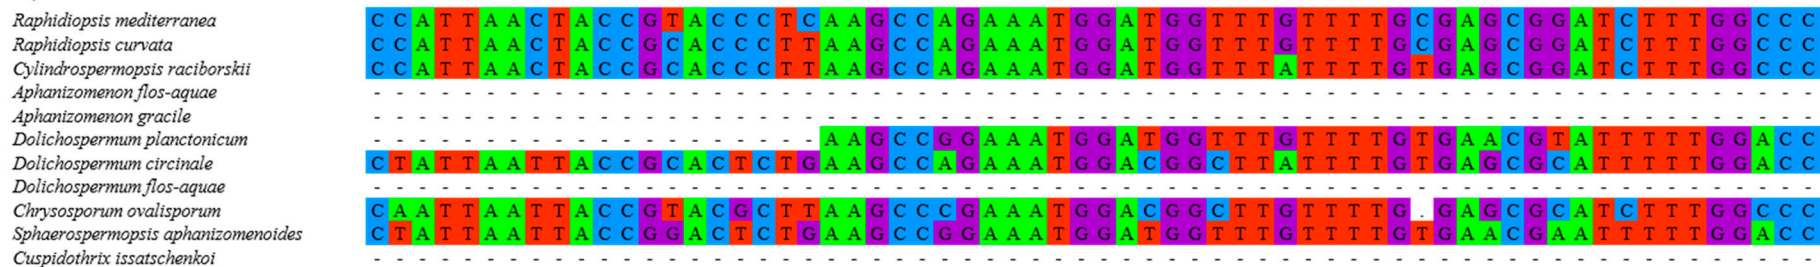

b)

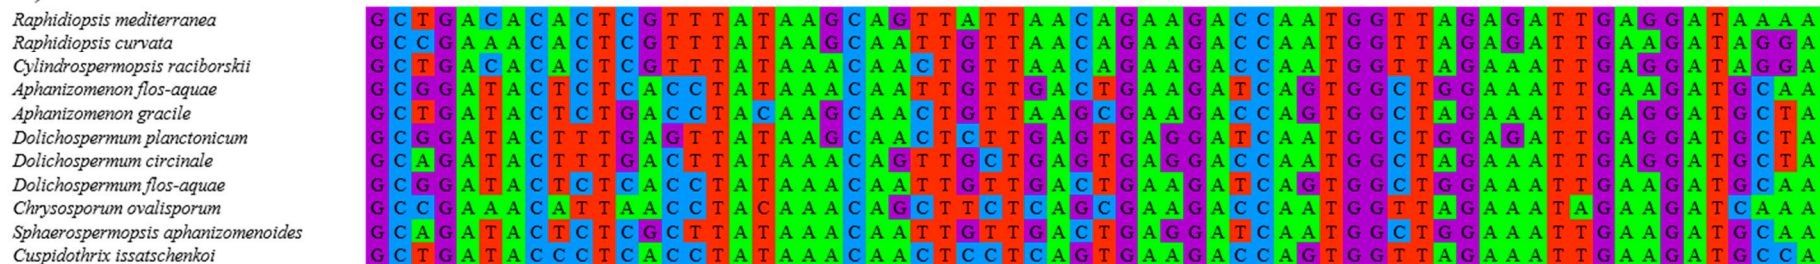

Figure S3. The results of multiple-sequence comparative analysis of *rpoC1* gene sequences from the nostocalean cyanobacteria; a) forward, b) reverse sequence.

a)

*Chrysoosporum ovalisporum*  
*Aphanizomenon flos-aquae*  
*Aphanizomenon gracile*  
*Dolichospermum planctonicum*  
*Dolichospermum flos-aquae*  
*Cylindrospermopsis raciborskii*  
*Sphaerospermopsis aphanizomenoides*  
*Cuspidothrix issatschenkoi*  
*Raphidiopsis mediterranea*  
*Raphidiopsis curvata*

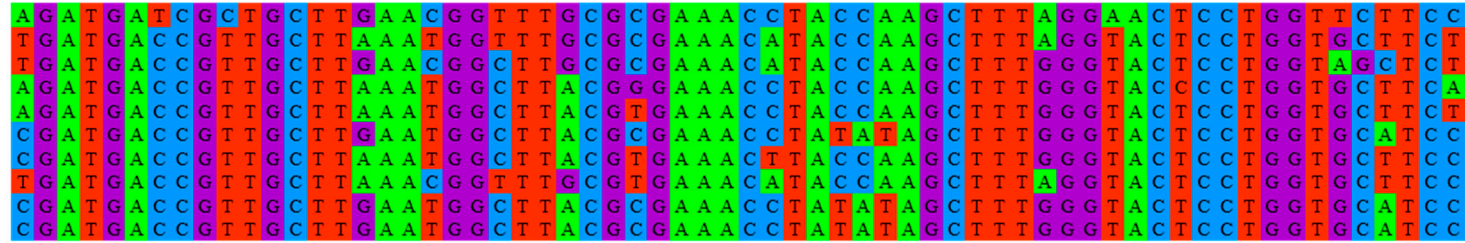

b)

*Chrysoosporum ovalisporum*  
*Aphanizomenon flos-aquae*  
*Aphanizomenon gracile*  
*Dolichospermum planctonicum*  
*Dolichospermum flos-aquae*  
*Cylindrospermopsis raciborskii*  
*Sphaerospermopsis aphanizomenoides*  
*Cuspidothrix issatschenkoi*  
*Raphidiopsis mediterranea*  
*Raphidiopsis curvata*

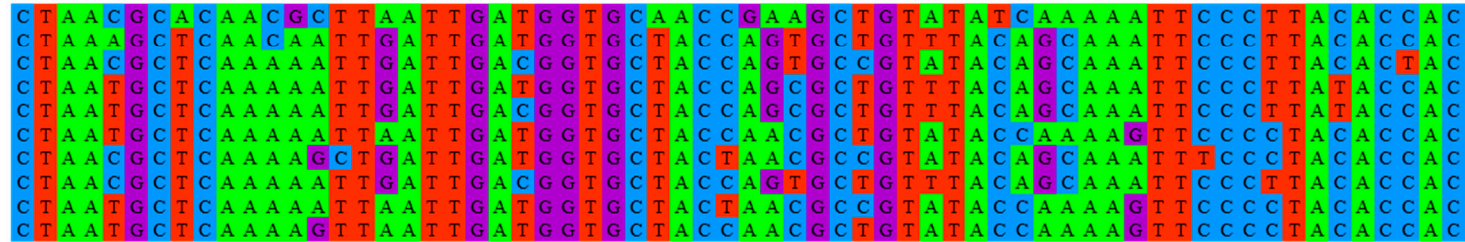

Figure S4. The results of multiple-sequence comparative analysis of *cpcBA* gene sequences from the nostocalean cyanobacteria; a) forward, b) reverse sequence.
